# Supplementary material
Source: PubMed Central journal article supplement (PMC6730729)
Supplement: 10815_2019_1536_MOESM1_ESM.pdf [file 10815_2019_1536_MOESM1_ESM.pdf]

## Decision Regret Study Questionnaire

| Survey measure                                   | Survey questions                                                                                                                                                                                                                                              | Description                                                                                                                                                                                                                                                                                                                                                                                                                                                                  |
|--------------------------------------------------|---------------------------------------------------------------------------------------------------------------------------------------------------------------------------------------------------------------------------------------------------------------|------------------------------------------------------------------------------------------------------------------------------------------------------------------------------------------------------------------------------------------------------------------------------------------------------------------------------------------------------------------------------------------------------------------------------------------------------------------------------|
| <b>Recollection of discussion.</b>               | - <i>Do you recall if such a discussion about fertility preservation occurred?</i><br>Y/N                                                                                                                                                                     | The first survey item assessed whether the participant recalled a discussion                                                                                                                                                                                                                                                                                                                                                                                                 |
| <b>Decision Regret.</b>                          | - <i>It was the right decision</i><br>- <i>I regret the choice that was made</i><br>- <i>I would go for the same choice if I had to do it over again</i><br>- <i>The choice did me a lot of harm</i><br>- <i>The decision was a wise one</i>                  | Current regret regarding the FP decision was measured using the validated DRS by Brehaut et al <sup>1</sup> . The DRS consists of five Likert-type response statements scored from 1 (strongly agree) to 5 (strongly disagree). Statements 2 and 4 are reverse-coded so that higher numbers indicate more regret. Scores are converted to a 0-100 scale (a score of 0 meaning no regret) by subtracting 1 from each item, multiplying by 25, and averaging the summed items. |
| <b>Expectations regarding the success of FP.</b> | - <i>My impression is that fertility preservation procedures are likely to be successful within my lifetime?</i><br>- <i>My impression is that fertility preservation procedures are likely to be successful within the lifetime of the next generation?.</i> | Two five-point Likert-type questions assessed participant impressions of the success of FP procedures in their lifetime and in that of the next generation                                                                                                                                                                                                                                                                                                                   |
| <b>Free-text data.</b>                           | - <i>Why are you satisfied with the decision that was made?</i><br>- <i>Why do you regret the decision that was made?</i>                                                                                                                                     | Two free-text response items allowed participants to provide reasons as to why they were satisfied with their decision or regretted it. Additionally, participants could indicate whether they wanted further contact from a senior investigator to discuss any concerns raised by the study regarding treatment or fertility.                                                                                                                                               |

### Abbreviations

DRS= Decision Regret Scale; FP= fertility preservation **References**

1. Brehaut JC, O'Connor AM, Wood TJ, et al. Validation of a decision regret scale. *Med Decis Mak.* 2003;23(4):28192.

In:

**Regret and acceptance of fertility preservation decisions in the pediatric and adolescent cancer population**
